# Supplementary material for: The conformational bases for the two functionalities of 2-cysteine peroxiredoxins as peroxidase and chaperone
Source: PubMed Central journal article supplement — J Exp Bot. 2013 Jul 4;64(11):3483–97. doi: 10.1093/jxb/ert184 (PMC3733160; doi:10.1093/jxb/ert184), 2013-07-04
Supplement: supp_ert184_jexbot101048_file001.pdf [file supp_ert184_jexbot101048_file001.pdf]

Figure S2: König et al.

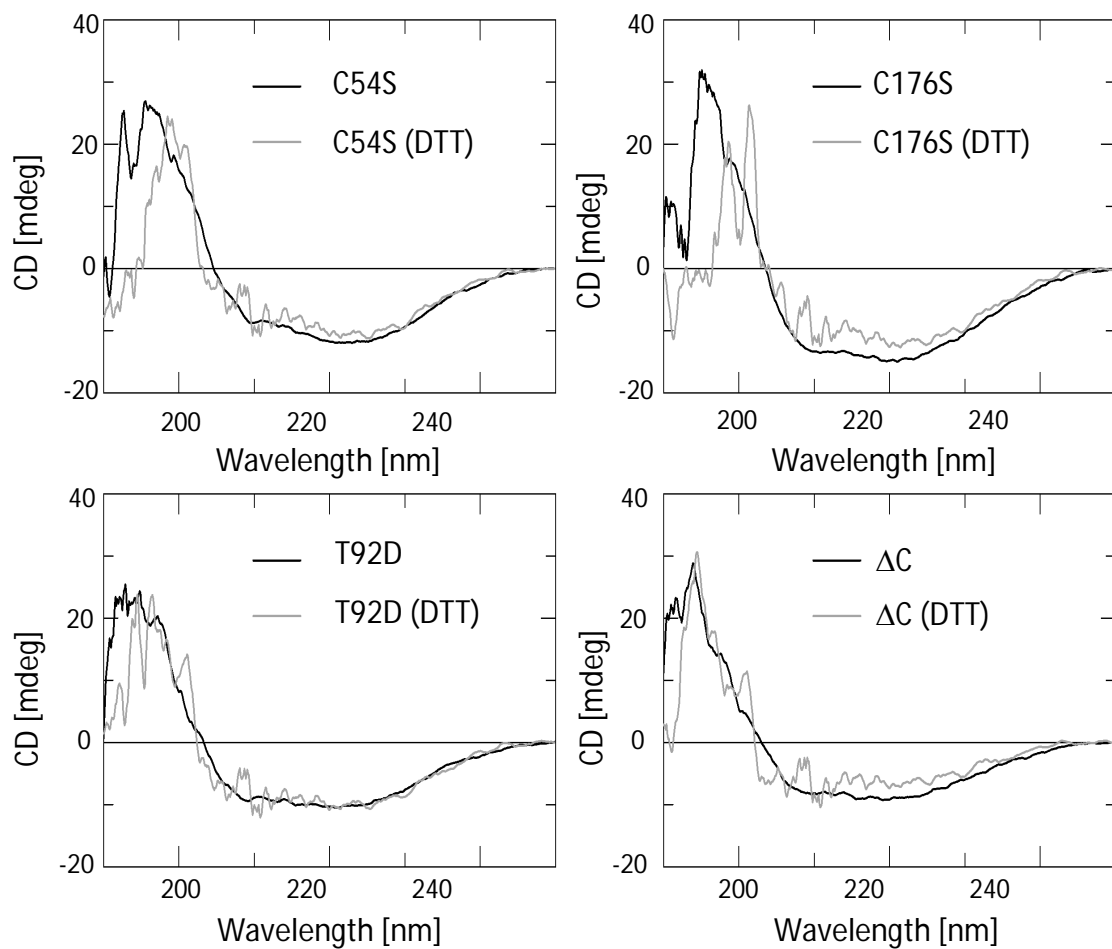

**Suppl. Figure 2. Secondary structure analysis of 2-CysPrx variants using circular dichroism spectroscopy.** 10 mM of non-treated and thus oxidised and reduced (10 mM DTT) 2-CysPrx WT and variants were analysed.

**Supplementary table:**

Table S1: Primers used for cloning of 2-CysPrx and variants

| Name           | 5'- 3' Sequence                                  |
|----------------|--------------------------------------------------|
| At_2CPA_F      | 5'- ATATACATATGGCCCAGGCCGATGATCTTCC-3'           |
| At_2CPA_R      | 5'- ATATAGAATTCTAAATAGCTGAGAAGTACTC-3'           |
| 2CP_stop_gwk_R | 5'-ATATAGAATTCCTACTTCCATCCTGCTGGG-3'             |
| 2CP_F84R_F     | 5'-TGTTTCTGTGCGATAGTGTGCGCTCTCACCTTGCATGGGTC-3'  |
| 2CP_F84R_R     | 5'-GACCCATGCAAGGTGAGAGCGCACACTATCGACAGAAACA-3'   |
| 2CP_C176K_F    | 5'-GAAAACCCGGATGAAGTCAAGCCAGCAGGATGGAAGCCG-3'    |
| 2CP_C176K_R    | 5'-CGGCTTCCATCCTGCTGGCTTGACTTCATCCGGGTTTTTC-3'   |
| 2CP_T92D_F     | 5'-CTCACCTTGCATGGGTCCAAGATGACAGGAAATCTGGAGGGC-3' |
| 2CP_T92D_R     | 5'-GCCCTCCAGATTTCTGTGCATCTTGGACCCATGCAAGGTGAG-3' |
| 2CP_C54S_F     | 5'-ACTTTCGTCTCCCAACA-3'                          |
| 2CP_C54S_R     | 5'-TGTTGGGGAGACGAAAGT-3'                         |
| 2CP_C176S_F    | 5'-ATGAAGTCTCCCCAGCA-3'                          |
| 2CP_C176S_R    | 5'-TGCTGGGGAGACTTCAT-3'                          |
| 2CP-C54D_F     | 5'-ACTTTCGTGCGACCAACAGAGATTACTG-3'               |
| 2CP_C54D_R     | 5'-CAGTAATCTCTGTTGGGTGCGACGAAAGT-3'              |
| At-NTRC-F      | 5'-ATATA CATATG T CAG GAG GCG AGA TTA TC-3'      |
| At-NTRC-R      | 5'-AAAAAA AAGCTT TCATTTATTGGCCTCAATG-3'          |
